# Supplementary material for: The effect of sociodemographic, socioeconomic, and health factors on healthcare utilization in cardiovascular patients in Serbia: a part of National Health Survey
Source: Frontiers journal article supplement (doi:10.3389/fpubh.2025.1569741), 2025-07-17

**Supplementary data 1. Patients with Cardiovascular Diseases in Percentages**

| Study population<br>N (%) | Cardiovascular Disease |
|---------------------------|------------------------|
| 4217 (89.5%)              | Hypertension           |
| 1293 (27.4%)              | Angina Pectoris        |
| 201 (4.3%)                | Myocardial Infarction  |
| 149 (3.2%)                | Stroke                 |

**Supplementary data 2. Exclusion Flowchart of the Participants**

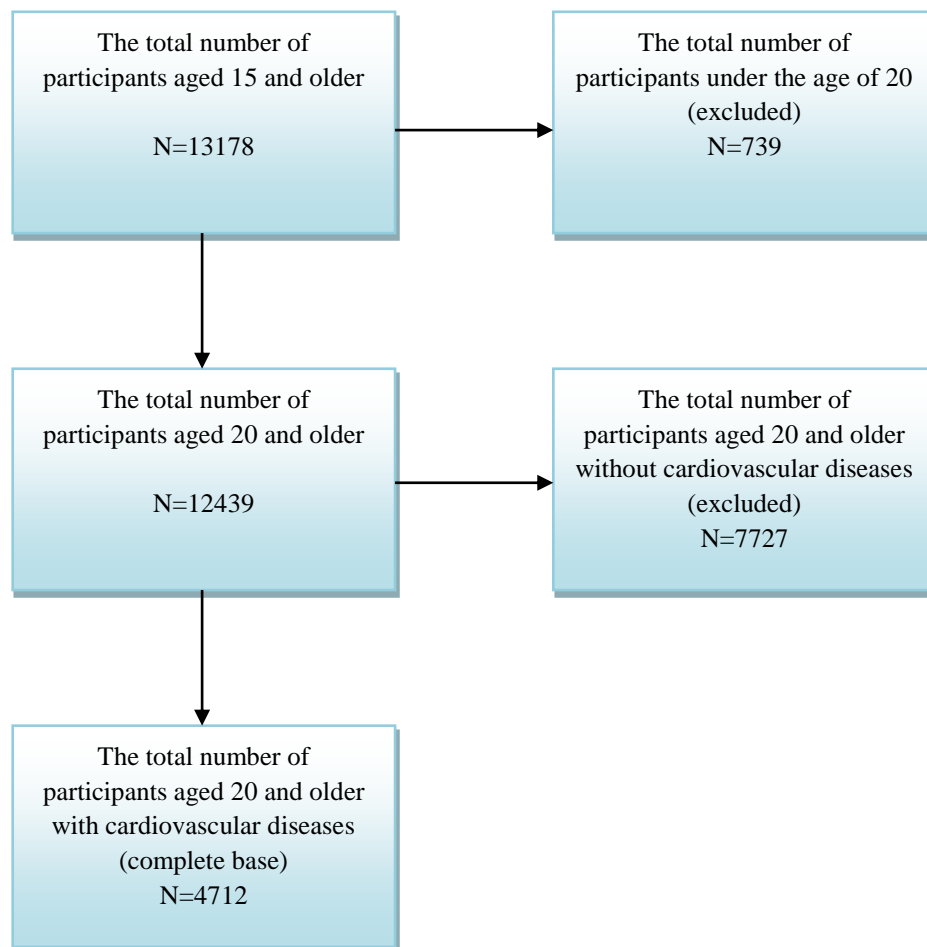

Supplement: Data_Sheet_1.pdf [file Data_Sheet_1.pdf]
