# Supplementary material for: The effect of sociodemographic, socioeconomic, and health factors on healthcare utilization in cardiovascular patients in Serbia: a part of National Health Survey
Source: Frontiers journal article supplement (doi:10.3389/fpubh.2025.1569741), 2025-07-17
Supplement: Table_1.docx [file Table_1.docx]

**Supplementary data 1.** Patients with Cardiovascular Diseases in Percentages

| **Cardiovascular Disease** | **Study population**  **N (%)** |
| --- | --- |
| Hypertension | 4217 (89.5%) |
| Angina Pectoris | 1293 (27.4%) |
| Myocardial Infarction | 201 (4.3%) |
| Stroke | 149 (3.2%) |

**Supplementary data 2.** Exclusion Flowchart of the Participants

The total number of participants aged 20 and older without cardiovascular diseases (excluded)

N=7727

The total number of participants aged 20 and older with cardiovascular diseases

(complete base)

N=4712

The total number of participants aged 20 and older

N=12439

The total number of participants under the age of 20 (excluded)

N=739

The total number of participants aged 15 and older

N=13178
